# Supplementary material for: Trends of Peatland Research Based on Topic Modeling: Toward Sustainable Management under Climate Change
Source: MDPI journal article supplement (doi:10.3390/f14091818), 2023-09-06
Supplement: s1 [file s1]

Archive with 1 entries (1 files):
- forests-2532115-supplementary.pdf
