# Supplementary material for: Trends of Peatland Research Based on Topic Modeling: Toward Sustainable Management under Climate Change
Source: MDPI journal article supplement (doi:10.3390/f14091818), 2023-09-06
Supplement: s1 [file s1 › forests-2532115-supplementary.pdf]

## Supplementary file

**Table S1.** List of stop-words for data pre-processing in dynamic topic modeling.

| Stage               | Type                     | Stop-words                                                                                                                                                                                                                                                                                                                                                                                                                                                                                                                                                                                                                                     |
|---------------------|--------------------------|------------------------------------------------------------------------------------------------------------------------------------------------------------------------------------------------------------------------------------------------------------------------------------------------------------------------------------------------------------------------------------------------------------------------------------------------------------------------------------------------------------------------------------------------------------------------------------------------------------------------------------------------|
| <b>First stage</b>  | Python NLTK stopwords    | English stop-words provided by NLTK                                                                                                                                                                                                                                                                                                                                                                                                                                                                                                                                                                                                            |
| <b>Second stage</b> | Verb                     | determine, indicate, melt, occupy, associate, reveal, suggest, investigate, find, compare, occur, follow, examine, observe, give, cause, represent, influence, derive, analyze, provide, require, make, identify, exist, contribute, consider, explore, could, integrate, limit, lead, support, create, discover, produce, discuss, obtain, improve, propose, combine, bind, describe, elevate, grow, reflect, archive, begin, underlie, alter, enhance, conduct, correlate, relate, induce, distinguish, promote, present, particulate, affect, characterize, need, inundate, shift, drive, mean, demonstrate, mange, search, play, highlight |
|                     | Adjective                | important, able, respective, variable, better, significant, great, major, coldest, main, particular, total, many, relative, lower, similar, potential, emergent, adjacent, several, common, various, highest                                                                                                                                                                                                                                                                                                                                                                                                                                   |
|                     | Noun                     | index, indices, role, level, efficiency, sequestration, methods, incorporation, field, addition, particles, model, year, evidence, regime, regimes, saturation, generation, regression, literature, project, assessment, properties, period, date, part, analysis, sheet                                                                                                                                                                                                                                                                                                                                                                       |
|                     | Numeral                  | first, three, four                                                                                                                                                                                                                                                                                                                                                                                                                                                                                                                                                                                                                             |
|                     | Conjunctions and Adverbs | although, even, previously, likely, along, within, however, especially, particularly, among, mainly, since, across, relatively, less, highly, around, intensively, generally, therefore, probably, agreeably, thus, conversely, according, finally, however, overall, early, respectively, toward                                                                                                                                                                                                                                                                                                                                              |

**Table S2.** Representative papers with high probability appearing in each topic calculated by dynamic topic modeling in peatland research.

| Topic                        | Title                                                                                                                                                                                           | Author (Year)                  |
|------------------------------|-------------------------------------------------------------------------------------------------------------------------------------------------------------------------------------------------|--------------------------------|
| 1<br>(Geomorphology)         | Holocene avulsion styles and sedimentation patterns of the Saskatchewan River, Cumberland Marshes, Canada                                                                                       | Morozova and Smith (2000)      |
|                              | Effects of peat on the shapes of alluvial channels: examples from the Cumberland Marshes, Saskatchewan, Canada                                                                                  | Smith and Pérez-Arlucea (2004) |
|                              | Electrical resistivity and Ground Penetrating Radar for the characterization of the internal architecture of Quaternary sediments in the Midlands of Ireland                                    | Pellicer and Gibson (2011)     |
|                              | Late Quaternary stratigraphy in the Gwent Levels (southeast Wales): the subsurface evidence                                                                                                     | Allen (2001)                   |
|                              | Late Quaternary stratigraphy, radiocarbon chronology, and glacial history at Cape Shpindler, southern Kara Sea, Arctic Russia                                                                   | Manley et al. (2001)           |
|                              | Near surface geophysical analysis of the Navamuño depression (Sierra de Béjar, Iberian Central System): Geometry, sedimentary infill and genetic implications of tectonic and glacial footprint | Carrasco et al. (2018)         |
|                              | Late Holocene coastal-plain evolution of the Netherlands: the role of natural preconditions in human-induced sea ingressions                                                                    | Pierik et al. (2017)           |
|                              | The hydraulic geometry of narrow and deep channels; evidence for flow optimization and controlled peatland growth                                                                               | Nanson et al. (2010)           |
|                              | Geomorphic, sedimentary, and potential palaeoenvironmental significance of peat blocks in alluvial river systems                                                                                | Warburton and Evans (2011)     |
|                              | Headwater peatland channels in south-eastern Australia; the attainment of equilibrium                                                                                                           | Nanson et al. (2014)           |
| 2<br>(Land use & Land cover) | Model-based prediction error uncertainty estimation for k-nn method                                                                                                                             | Kim and Tomppo (2006)          |
|                              | Data and resolution requirements in mapping vegetation in spatially heterogeneous landscapes                                                                                                    | Räsänen and Virtanen (2019)    |
|                              | A monitoring protocol for vegetation change on Irish peatland and heath                                                                                                                         | O'connell et al. (2014)        |
|                              | Soil type mapping using the generalised linear geostatistical model: A case study in a Dutch cultivated peatland                                                                                | Kempen et al. (2012)           |
|                              | Selecting estimation parameters for the Finnish multisource National Forest Inventory                                                                                                           | Katila and Tomppo (2001)       |
|                              | Monitoring peatland water table depth with optical and radar satellite imagery                                                                                                                  | Räsänen et al. (2022)          |
|                              | Temporal optimisation of image acquisition for land cover classification with Random Forest and MODIS time-series                                                                               | Nitze et al. (2015)            |
|                              | Evaluation of phenospectral dynamics with Sentinel-2A using a bottom-up approach in a northern ombrotrophic peatland                                                                            | Arroyo-Mora et al. (2018)      |
|                              | The fragmented nature of tundra landscape                                                                                                                                                       | Virtanen and Ek (2014)         |
|                              | Modelling the extent of northern peat soil and its uncertainty with Sentinel: Scotland as example of highly cloudy region                                                                       | Poggio et al. (2019)           |
| 3<br>(Production)            | Utilization of palm oil and its by-products in bio-asphalt and bio-concrete mixtures: A review                                                                                                  | Al-Sabaei et al. (2022)        |
|                              | Life cycle assessment of palm biodiesel: Revealing facts and benefits for sustainability                                                                                                        | Yee et al. (2009)              |
|                              | The effect of paper sludge and biochar addition on brown peat and coir based growing media properties                                                                                           | Méndez et al. (2015)           |
|                              | Occupational exposure to fungi on recyclable paper pots and growing media and associated health effects – A review of the literature                                                            | Madsen and Crook (2021)        |

|                        |                                                                                                                                                         |                                |
|------------------------|---------------------------------------------------------------------------------------------------------------------------------------------------------|--------------------------------|
|                        | Synthesis and evaluation of pyrolysis waste peat char supported catalyst for steam reforming of toluene                                                 | Gu et al. (2020)               |
|                        | Recycling pyrolyzed organic waste from plant nurseries, rice production and shrimp industry as peat substitute in potting substrates                    | Nocentini et al. (2021)        |
|                        | Novel seedling substrate made by different types of biogas residues: Feasibility, carbon emission reduction and economic benefit potential              | Meng et al. (2022)             |
|                        | Role of Biogas and Biochar Palm Oil Residues for Reduction of Greenhouse Gas Emissions in the Biodiesel Production                                      | Harsono et al. (2015)          |
|                        | Grow – Store – Steam – Re-peat: Reuse of spent growing media for circular cultivation of Chrysanthemum                                                  | Vandecasteele et al. (2020)    |
|                        | Agronomic performance, essential oils and hydrodistillation wastewaters of <i>Lavandula angustifolia</i> grown on biochar-based substrates              | Fascella et al. (2020)         |
| 4<br>(Green-house gas) | Warming reduces the increase in N <sub>2</sub> O emission under nitrogen fertilization in a boreal peatland                                             | Gong et al. (2019)             |
|                        | Temporal shifts in controls over methane emissions from a boreal bog                                                                                    | Wang et al. (2018)             |
|                        | Nitrogen addition (NH <sub>4</sub> NO <sub>3</sub> ) mitigates the positive effect of warming on methane fluxes in a coastal bog                        | Gong et al. (2021)             |
|                        | Global nitrogen input on wetland ecosystem : The driving mechanism of soil labile carbon and nitrogen on greenhouse gas emissions                       | Chen et al. (2020)             |
|                        | Long-term enhanced nitrogen deposition increases ecosystem respiration and carbon loss from a <i>Sphagnum</i> bog in the Scottish Borders               | Kivimäki et al. (2013)         |
|                        | Respiration and CH <sub>4</sub> fluxes in Tibetan peatlands are influenced by vegetation degradation                                                    | Ma et al. (2020)               |
|                        | Environmental controls on methane fluxes in a cool temperate bog                                                                                        | Ueyama et al. (2020)           |
|                        | How do increasing background concentrations of tropospheric ozone affect peatland plant growth and carbon gas exchange?                                 | Williamson et al. (2016)       |
|                        | Soil carbon dioxide emissions due to oxidative peat decomposition in an oil palm plantation on tropical peat                                            | Ishikura et al. (20218)        |
| 5<br>(Habitat)         | Temperature response of ex-situ greenhouse gas emissions from tropical peatlands: Interactions between forest type and peat moisture conditions         | Sjögersten et al. (2018)       |
|                        | Displacement of dunlin <i>Calidris alpina schinzii</i> by forestry in the Flow Country and an estimate of the value of moorland adjacent to plantations | Lavers and Haines-Young (1997) |
|                        | Biodiversity of the ground-dwelling spider fauna of afforestation habitats                                                                              | Oxbrough et al. (2007)         |
|                        | Habitat occupancy patterns and activity rate of native mammals in tropical fragmented peat swamp reserves in Peninsular Malaysia                        | Sasidhran et al. (2016)        |
|                        | Values and perceptions of landowners within remaining breeding territories of Eurasian Curlew <i>Numenius arquata</i> in Ireland                        | Sheridan et al. (2022)         |
|                        | Mapping and predicting forest loss in a Sumatran tiger landscape from 2002 to 2050                                                                      | Poor et al. (2019)             |
|                        | Changes on the heathlands in Dorset, England, between 1986 and 1996                                                                                     | Rose et al. (2000)             |
|                        | Substantial decline of Northern European peatland bird populations: Consequences of drainage                                                            | Fraixedas et al. (2017)        |
|                        | More wilderness for Germany: Implementing an important objective of Germany's National Strategy on Biological Diversity                                 | Schumacher et al. (2018)       |
|                        | Soil degradation in oil palm and rubber plantations under land resource scarcity                                                                        | Guillaume et al. (2016)        |
| 6                      | Is 15% restoration sufficient to safeguard the habitats of boreal red-listed mire plant species?                                                        | Tolvanen et al. (2020)         |
|                        | The role of peat on permafrost thaw based on field observations                                                                                         | Du et al. (2022)               |

|                   |                                                                                                                                                                                                                                                                      |                                      |
|-------------------|----------------------------------------------------------------------------------------------------------------------------------------------------------------------------------------------------------------------------------------------------------------------|--------------------------------------|
| (Permafrost)      | Hydro-thermal processes and thermal offsets of peat soils in the active layer in an alpine permafrost region, NE Qinghai-Tibet plateau                                                                                                                               | Wang et al. (2017)                   |
|                   | Contemporary sand wedge development in seasonally frozen ground and paleoenvironmental implications                                                                                                                                                                  | Wolfe et al. (2018)                  |
|                   | Flow path oscillations in transient ground-water simulations of large peatland systems                                                                                                                                                                               | Reeve et al. (2006)                  |
|                   | Thaw-induced impacts on land and water in discontinuous permafrost: A review of the Taiga Plains and Taiga Shield, northwestern Canada                                                                                                                               | Wright et al. (2022)                 |
|                   | Hydrologic function of a moderate-rich fen watershed in the Athabasca Oil Sands Region of the Western Boreal Plain, northern Alberta                                                                                                                                 | Elmes and Price (2019)               |
|                   | Groundwater flow patterns in a large peatland                                                                                                                                                                                                                        | Fraser et al. (2001)                 |
|                   | Groundwater-surface water interaction between an esker aquifer and a drained fen                                                                                                                                                                                     | Rossi et al. (2012)                  |
|                   | Permafrost thaw and climate warming may decrease the CO <sub>2</sub> , carbon, and metal concentration in peat soil waters of the Western Siberia Lowland                                                                                                            | Raudina et al. (2018)                |
|                   | Groundwater Flow with Energy Transport and Water-Ice Phase Change: Numerical Simulations, Benchmarks, and Application to Freezing in Peat Bogs                                                                                                                       | Mckenzie et al. (2007)               |
| 7<br>(Management) | Deliberative engagement and REDD+ in Indonesia                                                                                                                                                                                                                       | Boer (2019)                          |
|                   | Evaluation of policy instruments for supporting greenhouse gas mitigation efforts in agricultural and urban land use                                                                                                                                                 | Kärkkäinen et al. (2020)             |
|                   | Empower Eco multiactor HUB: A triple helix ‘academia-industry-authority’ approach to creating and sharing potentially disruptive tools for addressing novel and emerging new Green Deal opportunities under a United Nations Sustainable Development Goals framework | Rowan and Casey (2021)               |
|                   | Synergies and trade-offs between nature conservation and climate policy: Insights from the “Natural Capital Germany – TEEB DE” study                                                                                                                                 | Wüstemann et al. (2017)              |
|                   | Conflicting rationalities, knowledge and values in scarred landscapes                                                                                                                                                                                                | Collier and Scott (2009)             |
|                   | An Empirical Analysis of Institutional Demand for Valuation Knowledge                                                                                                                                                                                                | Primmer et al. (2018)                |
|                   | Multimethod valuation of peatland ecosystem services: Combining choice experiment, multicriteria decision analysis and deliberative valuation                                                                                                                        | Saarikoski et al. (2022)             |
|                   | More data, more problems? Incompatible uncertainty in Indonesia’s climate change mitigation projects                                                                                                                                                                 | Goldstein (2022)                     |
|                   | Assigning value to cultural ecosystem services: The significance of memory and imagination in the conservation of Irish peatlands                                                                                                                                    | Flood et al. (2021)                  |
| 8<br>(Deposit)    | Supporting collaborative policy processes with a multi-criteria discussion of costs and benefits: The case of soil subsidence in Dutch peatlands                                                                                                                     | van Hardeveld et al. (2018)          |
|                   | A short-term establishment of forest fen habitat during Pliocene lignite formation in the Ptolemais Basin, NW Macedonia, Greece                                                                                                                                      | Kalaitzidis et al. (2004)            |
|                   | Geochemical, petrographic and palynologic characteristics of two late middle Pennsylvanian (Asturian) coal-to-shale sequences in the eastern Interior Basin, USA                                                                                                     | Eble and Greb (2018)                 |
|                   | Microfacies and depositional environment of Tertiary Tanjung Enim low rank coal, South Sumatra Basin, Indonesia                                                                                                                                                      | Amijaya and Littke (2005)            |
|                   | Pliocene lignites from Apofysis mine, Amynteo basin, Northwestern Greece: petrographical characteristics and depositional environment                                                                                                                                | Iordanidis and Georgakopoulos (2003) |
|                   | Coal deposition in the Barito Basin (Southeast Borneo): The Eocene Tanjung Formation compared to the Miocene Warukin Formation                                                                                                                                       | Fikri et al. (2022)                  |
|                   | The origin of pale and dark layers in Pliocene lignite deposits from                                                                                                                                                                                                 | Liu et al. (2018)                    |

|                             |                                                                                                                                                                                                                                      |                           |
|-----------------------------|--------------------------------------------------------------------------------------------------------------------------------------------------------------------------------------------------------------------------------------|---------------------------|
|                             | Yunnan Province, Southwest China, based on coal petrological and organic geochemical analyses                                                                                                                                        |                           |
|                             | Comparing maceral ratios from tropical peatlands with assumptions from coal studies: do classic coal petrographic interpretation methods have to be discarded?                                                                       | Wüst et al. (2001)        |
|                             | Composition of lipids from the First Lusatian lignite seam of the Konin Basin (Poland): Relationships with vegetation, climate and carbon cycling during the mid-Miocene Climatic Optimum                                            | Bechtel et al. (2019)     |
|                             | Scanidium in the coals of Northern Asia ( <i>Siberia, the Russian Far East, Mongolia, and Kazakhstan</i> )                                                                                                                           | Arbuzov et al. (2014)     |
|                             | Cryptic abundance of long-chain <i>iso</i> and <i>anteiso</i> alkanes in the Dajiuhu peat deposit, central China                                                                                                                     | Huang et al. (2014)       |
| 9<br>(Fire)                 | Comparative study of the temporal evolution of atmospheric lead deposition in Scotland and eastern Canada using blanket peat bogs                                                                                                    | Weiss et al. (2002)       |
|                             | Local and transboundary factors' impacts on trace gases and aerosol during haze episode in 2015 El Niño in Malaysia                                                                                                                  | Samsuddin et al. (2018)   |
|                             | Quantitative assessment of source contributions to PM <sub>2.5</sub> on the west coast of Peninsular Malaysia to determine the burden of Indonesian peatland fire                                                                    | Fujii et al. (2017)       |
|                             | Characteristics of carbonaceous aerosols emitted from peatland fire in Riau, Sumatra, Indonesia                                                                                                                                      | Fujii et al. (2014)       |
|                             | Peat-fire-related air pollution in Central Kalimantan, Indonesia                                                                                                                                                                     | Hayasaka et al. (2014)    |
|                             | A multi-year and high-resolution inventory of biomass burning emissions in tropical continents from 2001-2017 based on satellite observations                                                                                        | Shi et al. (2020)         |
|                             | Analysis of source regions for smoke events in Singapore for the 2009 El Nino burning season                                                                                                                                         | Atwood et al. (2013)      |
|                             | Impacts of peat-forest smoke on urban PM <sub>2.5</sub> in the Maritime Continent during 2012-2015: Carbonaceous profiles and indicators                                                                                             | Tham et al. (2019)        |
|                             | Characterization of carbonaceous compounds emitted from Indonesian surface and sub surface peat burning                                                                                                                              | Lestari et al. (2020)     |
| 10<br>(Soil organic matter) | Peat-forest burning smoke in Maritime Continent: Impacts on receptor PM <sub>2.5</sub> and implications at emission sources                                                                                                          | Lan et al. (2021)         |
|                             | Biodegradation of norflurazon in a bog soil                                                                                                                                                                                          | Savin and Amador (1998)   |
|                             | Physical protection and biochemical quality of organic matter in Mediterranean calcareous forest soils: a density fractionation approach                                                                                             | Rovira and Vallejo (2003) |
|                             | Different effects of peat degradation on dissolved organic carbon and nitrogen                                                                                                                                                       | Kalbitz and Geyer (2002)  |
|                             | Geochemistry of three contrasting British peatlands: Complex patterns of cation availability and implications for microbial metabolism                                                                                               | Gogo et al. (2010)        |
|                             | The effect of afforestation on the soil organic carbon (SOC) of a peaty gley soil using on-line thermally assisted hydrolysis and methylation (THM) in the presence of <sup>13</sup> C-labelled tetramethylammonium hydroxide (TMAH) | Mason et al. (2009)       |
|                             | Adsorption of organic matter on clay minerals in the Dajiuhu peat soil chronosequence, South China                                                                                                                                   | Hong et al. (2019)        |
|                             | Impact of siltation on the stability of organic matter in drained peatlands                                                                                                                                                          | Kalisz et al. (2021)      |
|                             | Influence of source vegetation and redox conditions on lignin-based decomposition proxies in graminoid-dominated ombrotrophic peat (Penido Vello, NW Spain)                                                                          | Schellekens et al. (2015) |
|                             | Morphology, chemical properties, and radiocarbon dating of eutrophic peat in Turkey                                                                                                                                                  | Cayci et al. (2011)       |

|                                      |                                                                                                                                                               |                              |
|--------------------------------------|---------------------------------------------------------------------------------------------------------------------------------------------------------------|------------------------------|
|                                      | Iron and silicon isotope behavior accompanying weathering in Icelandic soils, and the implications for iron export from peatlands                             | Opfergelt et al. (2017)      |
|                                      | Electron accepting capacity of dissolved and particulate organic matter control CO <sub>2</sub> and CH <sub>4</sub> formation in peat soils                   | Gao et al. (2019)            |
| 11<br>(Peatland formation)           | Field-scale compression of Sphagnum moss to improve water retention in a restored bog                                                                         | Gauthier et al. (2022)       |
|                                      | Water table dynamics in undisturbed, drained and restored blanket peat                                                                                        | Holden et al. (2011)         |
|                                      | Soil moisture, water tension, and water table relationships in a managed cutover bog                                                                          | Price (1997)                 |
|                                      | Peatland water repellency: Importance of soil water content, moss species, and burn severity                                                                  | Moore et al. (2017)          |
|                                      | The hydrology of the Bois-des-Bel bog peatland restoration: 10 years post-restoration                                                                         | McCarter et al. (2013)       |
|                                      | The effects of long-term drainage and subsequent restoration on water table level and pore water chemistry in boreal peatlands                                | Haapalehto et al. (2014)     |
|                                      | Effect of stockpiling time on donor-peat hydrophysical properties: Implications for peatland restoration                                                      | Lehan et al. (2022)          |
|                                      | Historical peat loss explains limited short-term response of drained blanket bogs to rewetting                                                                | Williamson et al. (2017)     |
|                                      | Burned and unburned peat water repellency: Implications for peatland evaporation following wildfire                                                           | Kettridge et al. (2014)      |
|                                      | Decreased summer water table depth affects peatland vegetation                                                                                                | Breeuwer et al. (2009)       |
| 12<br>(Forest)                       | Effect of fertilization on the biomass production of coppiced mixed birch and willow stands on a cut-away peatland                                            | Hytönen and Kaunisto (1999)  |
|                                      | Performance of planted and naturally regenerated seedlings in Picea abies-dominated shelterwood stands and clearcuts in Sweden                                | Holgén and Hånell (2000)     |
|                                      | Effect of wood ash on the biomass production and nutrient status of young silver birch ( <i>Betula pendula</i> Roth) trees on cutaway peatlands in Estonia    | Kikamägi et al. (2013)       |
|                                      | Long-term biomass production and nutrient uptake of birch, alder and willow plantations on cut-away peatland                                                  | Hytönen and Saarsalmi (2009) |
|                                      | Effects of stabilized wood ash on nutrient status and growth of Scots pine – Comparison between uplands and peatlands                                         | Moilanen et al. (2013)       |
|                                      | Ash-fertilization improves germination and early establishment of birch ( <i>Betula pubescens</i> Ehrh.) seedlings on a cut-away peatland                     | Huotari et al. (2008)        |
|                                      | Needle litter response of peatland tamarack and black spruce to fertilization of minerotrophic peatland sites                                                 | Mugasha et al. (1996)        |
|                                      | Recovery of understory vegetation after stem-only and whole-tree harvesting in drained peatland forests                                                       | Hamberg et al. (2019)        |
|                                      | Effects of fertilization on seasonal patterns of foliar mass and nutrients of tamarack and black spruce on undrained and drained minerotrophic peatland sites | Mugasha a et al. (1999)      |
|                                      | Influence of harvest time and frequency on light interception and biomass yield of festulolium and tall fescue cultivated on a peatland                       | Kandel et al. (2016)         |
| 13<br>(Past environment -tal change) | Inverse phase oscillations between the East Asian and Indian Ocean summer monsoons during the last 12000 years and paleo-El Niño                              | Hong et al. (2005)           |
|                                      | Vegetation responses to the last glacial and early Holocene environmental changes in the northern Leizhou Peninsula, south China                              | Xue et al. (2015)            |
|                                      | High-frequency vegetation and climatic changes during the Lateglacial inferred from the Lapsou pollen record (Cantal, southern Massif Central, France)        | Dupart-Oualid et al. (2022)  |
|                                      | A continuous record of vegetation and climate change over the past 50,000 years in the Fujian Province of eastern subtropical China                           | Yue et al. (2012)            |

|                 |                                                                                                                                                                                     |                            |
|-----------------|-------------------------------------------------------------------------------------------------------------------------------------------------------------------------------------|----------------------------|
|                 | Climate and vegetation history from a 14,000-year peatland record, Kenai Peninsula, Alaska                                                                                          | Jones et al. (2009)        |
|                 | Holocene climate changes inferred from peat humification: A case study from the Daiyun Mountains, Southeast China                                                                   | Ma et al. (2021)           |
|                 | Moisture conditions during the Younger Dryas and 4.2 ka event as revealed from a subalpine peat record in the Luoxiao Mountains, southern China                                     | Shuchun et al. (2022)      |
|                 | Multi-proxy analyses of a peat bog on Isla de los Estados, easternmost Tierra del Fuego: a unique record of the variable Southern Hemisphere Westerlies since the last deglaciation | Björck et al. (2012)       |
|                 | The Holocene paleoenvironmental history of central European Russia reconstructed from pollen, plant macrofossil, and testate amoeba analyses of the Klukva peatland, Tula region    | Novenko et al. (2015)      |
|                 | Holocene vegetation and climate variability in North Pre-Baikal region, East Siberia, Russia                                                                                        | Bezrukova et al. (2011)    |
| 14<br>(Microbe) | Using DNA-barcoding for sorting out protist species complexes: A case study of the <i>Nebela tinctoria-collaris-bohemica</i> group (Amoebozoa; Arcellinida, Hyalospheniidae)        | Kosakyan et al. (2013)     |
|                 | High-throughput sequencing reveals diverse oomycete communities in oligotrophic peat bog micro-habitat                                                                              | Singer et al., (2016)      |
|                 | Effects of rotifers, copepods and chironomid larvae on microbial communities in peatlands                                                                                           | Mieczan et al. (2015)      |
|                 | Hydrology driven vertical distribution of prokaryotes and methane functional groups in a subtropical peatland                                                                       | Wang et al. (2022)         |
|                 | Differential detection of type II methanotrophic bacteria in acidic peatlands using newly developed 16S rRNA-targeted fluorescent oligonucleotide probes                            | Dedysh et al. (2003)       |
|                 | <i>Arcella peruviana</i> sp. nov. (Amoebozoa: Arcellinida, Arcellidae), a new species from a tropical peatland in Amazonia                                                          | Reczuga et al. (2015)      |
|                 | Microbial activity and community structure in two drained fen soils in the Ljubljana Marsh                                                                                          | Kraigher et al. (2006)     |
|                 | The rhizosphere and PAH amendment mediate impacts on functional and structural bacterial diversity in sandy peat soil                                                               | Yrjälä et al. (2010)       |
|                 | Isolation and characterization of oligotrophic acido-tolerant methanogenic consortia from a <i>Sphagnum</i> peat bog                                                                | Sizova et al. (2003)       |
|                 | Detection of methanogenic <i>Archaea</i> in peat: comparison of PCR primers targeting the <i>mcrA</i> gene                                                                          | Juottonen et al. (2006)    |
| 15<br>(Metal)   | Geochemical modeling of Fe (II) binding to humic and fulvic acids                                                                                                                   | Catrouillet et al. (2014)  |
|                 | Peatlands: a major sink of naturally formed organic chlorine                                                                                                                        | Keppler and Biester (2003) |
|                 | Human cell mutagenicity of chlorinated and unchlorinated water and the disinfection byproduct 3-chloro-4-(dichloromethyl)-5-hydroxy-2(5H)-furanone (MX)                             | Woodruff et al. (2001)     |
|                 | Chemical speciation of mercury, sulfur and iron in a dystrophic boreal lake sediment, as controlled by the formation of mackinawite and framboidal pyrite                           | Skyllberg et al. (2021)    |
|                 | Coagulation of organo-mineral colloids and formation of low molecular weight organic and metal complexes in boreal humic river water under UV-irradiation                           | Drozdova et al. (2020)     |
|                 | Biogeochemical influences on net methylmercury formation proxies along a peatland chronosequence                                                                                    | Wang et al. (2021)         |
|                 | Copper (II) adsorption from aqueous solution by herbaceous peat                                                                                                                     | Gündoğan et al. (2004)     |
|                 | Shifts in mercury methylation across a peatland chronosequence: From sulfate reduction to methanogenesis and syntrophy                                                              | Hu et al. (2020)           |

|                   |                                                                                                                                                                             |                          |
|-------------------|-----------------------------------------------------------------------------------------------------------------------------------------------------------------------------|--------------------------|
| 16<br>(Hydrology) | The genesis and transformation of organo-mineral colloids in a drained peatland area                                                                                        | Couture et al. (1998)    |
|                   | Opposing spatial trends in methylmercury and total mercury along a peatland chronosequence trophic gradient                                                                 | Wang et al. (2020)       |
|                   | Trends in hydrometeorological conditions and stream water organic carbon in boreal forested catchments                                                                      | Sarkkola et al. (2009)   |
|                   | pH variability in catchment flows to estuaries – A South African perspective                                                                                                | Omarjee et al. (2021)    |
|                   | Rainfall intensity and catchment size control storm runoff in a gullied blanket peatland                                                                                    | Edokpa et al. (2022)     |
|                   | Ecohydrological determinants of seasonality and export of total organic carbon in Narew River with high peatland contribution (north-eastern Poland)                        | Górniak (2019)           |
|                   | Nitrogen in river basins: Sources, retention in the surface waters and peatlands, and fluxes to estuaries in Finland                                                        | Lepistö et al. (2006)    |
|                   | The effect of interactions between rainfall patterns and land-cover change on flood peaks in upland peatlands                                                               | Gao et al. (2018)        |
|                   | The estuarine mixing behaviour of peatland derived dissolved organic carbon and its relationship to chromophoric dissolved organic matter in two North Sea estuaries (U.K.) | Spencer et al. (2007)    |
|                   | Creation and functioning of a buffer zone in a blanket peat forested catchment                                                                                              | O'Driscoll et al. (2014) |
|                   | Generation and regulation of summer runoff in a boreal flat fen                                                                                                             | Kværner et al. (2008)    |
|                   | Elevated nutrient concentrations in headwaters affected by drained peatland                                                                                                 | Marttila et al. (2018)   |
